# Supplementary material
Source: PubMed Central journal article supplement (PMC3624576)
Supplement: JB.01979-12_zjb999092546so1.pdf [file JB.01979-12_zjb999092546so1.pdf]

## SUPPLEMENTAL MATERIALS

### **A genetic examination of initial amino acid oxidation and glutamate catabolism in the hyperthermophilic archaeon *Thermococcus kodakarensis***

Yuusuke Yokooji<sup>1</sup>, Takaaki Sato<sup>1,4</sup>, Shinsuke Fujiwara<sup>2</sup>, Tadayuki Imanaka<sup>3,4</sup> and

Haruyuki Atomi<sup>1,4</sup>

<sup>1</sup>Department of Synthetic Chemistry and Biological Chemistry, Graduate School of Engineering, Kyoto University, Katsura, Nishikyo-ku, Kyoto 615-8510, Japan

<sup>2</sup>Department of Bioscience, School of Science and Technology, Kwansai-Gakuin University, 2-1 Gakuen, Sanda 669-1337, Japan.

<sup>3</sup>Department of Biotechnology, College of Life Sciences, Ritsumeikan University, Noji-higashi, Kusatsu, Shiga 525-8577, Japan

<sup>4</sup>JST, CREST, Sanbancho, Chiyoda-ku, Tokyo 102-0075, Japan

Table S1. Primers used in this study.

| Primer names     | Primer sequences                            |
|------------------|---------------------------------------------|
| <i>Dgdh</i> -F1  | 5'- AAAGGATCCTTGACCCAGCGCTCGATACCCTTGCT -3' |
| <i>Dgdh</i> -R1  | 5'- AAAAAAGAATTCATCAACTCCAAGTCTCTCCGCT -3'  |
| <i>Dgdh</i> -F2  | 5'- TTTCTTCTCCCTTTTCTCTTGTCT -3'            |
| <i>Dgdh</i> -R2  | 5'- GTTTTGAACAAAAAGTTAAATAGTGAAA -3'        |
| <i>Dgdh</i> -F3  | 5'- GGAAAGAGAGTGAGCTGAGAGATG -3'            |
| <i>Dgdh</i> -R3  | 5'- GATGATAAGGGCGATGGTGGAAAG -3'            |
| <i>Dgdh</i> -F4  | 5'- CGAGGGACAGCGTGAAGAATATCTG -3'           |
| <i>Dgdh</i> -R4  | 5'- AATTCTGGAGGGGTGTGCTGAAATGA -3'          |
| <i>Dgdh</i> -F5  | 5'- ATGGTCGAGATTGACCCGTTTGAGAT -3'          |
| <i>Dgdh</i> -R5  | 5'- TTCTTCTCCTTGTGGGTGTTGAAAG -3'           |
| <i>Dogor</i> -F1 | 5'- AAAGGATCCGGCAAAAACGGAGGGAATCGCAGT -3'   |
| <i>Dogor</i> -R1 | 5'- AAAGGATCCCGAGCTTAACCTTTCCGTGCCATGCT -3' |
| <i>Dogor</i> -F2 | 5'- GTGAGCAGGGAAGCGATAGAAAAGGC -3'          |
| <i>Dogor</i> -R2 | 5'- TATCGGGTAGCCAGCGTAGAAGCGGCA -3'         |
| <i>Dogor</i> -F3 | 5'- GCGGAGGAAACGACGGGACTTG -3'              |
| <i>Dogor</i> -R3 | 5'- CCCTGAAATCCGAGAGGAGAAT -3'              |
| <i>Dogor</i> -F4 | 5'- CGAGATAGGAAAGCTGAGTGCGGAG -3'           |
| <i>Dogor</i> -R4 | 5'- GCTGGGAGGACGAAAACCAAGTGC -3'            |
| <i>Dogor</i> -F5 | 5'-ACAGATGGAGGACGAGATAGC -3'                |
| <i>Dogor</i> -R5 | 5'- CGCGTAGTCGGGGCTGAGGGTCTTG -3'           |
| <i>Dscs</i> -F1  | 5'- GACGAATTCGAACTCCTCGATTGTTCTGACG -3'     |
| <i>Dscs</i> -R1  | 5'- GGGGAATTCATCGCCGCTTCGCCCCACATA -3'      |
| <i>Dscs</i> -F2  | 5'- GCTTTTAGCCCAAGCGCTCTAAAATCT -3'         |
| <i>Dscs</i> -R2  | 5'- TGAAATCACCTCCGAAGCTTTT -3'              |
| <i>Dscs</i> -F3  | 5'- AGATTGTCTGAGGCGTCTTCCGAG -3'            |
| <i>Dscs</i> -R3  | 5'- GGATATGTTGAAATAGACAAAACCG -3'           |
| <i>Dscs</i> -F4  | 5'- TCATTGGCCTCTCTCTGAGCAGTT -3'            |
| <i>Dscs</i> -R4  | 5'- CCAAGCACCTATCGGCCATCTTCCT -3'           |
| <i>Dscs</i> -F5  | 5'- CGTCGCAGTCATAGGTGCCTCAAACGTGC -3'       |
| <i>Dscs</i> -R5  | 5'- GTTCCTTGCCATCTTGTGCGGGTAGTCTC -3'       |
| <i>Egdh</i> -F1  | 5'- TTTGTCACTTTTTCAAATCTATCTTG -3'          |
| <i>Egdh</i> -R1  | 5'- CTTCTGTTTCGTTTTTATTTAGTTT -3'           |
| <i>Egdh</i> -F2  | 5'- GAGACCATAATGAGGAGAAAGGGC -3'            |
| <i>Egdh</i> -R2  | 5'- CAGCTTTTTGAGAGGCATATGCATCACC -3'        |

Bold sequences represent restriction sites..

Table S2. Amino acid dehydrogenase activity in *T. kodakarensis*.

| Strain   | KUW1                  |                   |                  |                   | KGDH1            |                   | KGDH1C           |                   |
|----------|-----------------------|-------------------|------------------|-------------------|------------------|-------------------|------------------|-------------------|
|          | ASW-YT-S <sup>0</sup> |                   | ASW-YT-Pyr       |                   | ASW-YT-Pyr       |                   | ASW-YT-Pyr       |                   |
| Cofactor | NAD <sup>+</sup>      | NADP <sup>+</sup> | NAD <sup>+</sup> | NADP <sup>+</sup> | NAD <sup>+</sup> | NADP <sup>+</sup> | NAD <sup>+</sup> | NADP <sup>+</sup> |
| Glu      | 39.5 ± 4.8<br>*1      | 24700 ± 300       | 26.9 ± 1.2       | 21900 ± 300       | < 2              | < 2               | 39.6 ± 4.6       | 27800 ± 100       |
| Gln      | < 2                   | 4.7 ± 0.3         | < 2              | 12.3 ± 0.6        | < 2              | < 2               | N.D.*2           | 26.0 ± 1.4        |
| Asp      | < 2                   | < 2               | < 2              | < 2               | < 2              | < 2               | N.D.             | N.D.              |
| Asn      | < 2                   | < 2               | < 2              | < 2               | < 2              | < 2               | N.D.             | N.D.              |
| Ala      | < 2                   | < 2               | < 2              | 6.7 ± 0.5         | < 2              | < 2               | N.D.             | 11.0 ± 0.6        |
| Val      | < 2                   | < 2               | < 2              | 4.5 ± 2.4         | < 2              | < 2               | N.D.             | 7.9 ± 0.8         |
| Leu      | < 2                   | < 2               | < 2              | < 2               | < 2              | < 2               | N.D.             | N.D.              |
| Ile      | < 2                   | < 2               | < 2              | < 2               | < 2              | < 2               | N.D.             | N.D.              |
| Gly      | < 2                   | < 2               | < 2              | < 2               | < 2              | < 2               | N.D.             | N.D.              |
| Ser      | < 2                   | < 2               | < 2              | < 2               | 12.3 ± 1.0       | < 2               | < 2              | N.D.              |
| Thr      | 51.6 ± 2.0            | < 2               | 98.3 ± 5.8       | < 2               | 163 ± 14         | < 2               | 55.4 ± 2.2       | N.D.              |
| Pro      | < 2                   | < 2               | < 2              | < 2               | < 2              | < 2               | N.D.             | N.D.              |
| Arg      | < 2                   | < 2               | < 2              | < 2               | < 2              | < 2               | N.D.             | N.D.              |
| Lys      | < 2                   | < 2               | < 2              | < 2               | < 2              | < 2               | N.D.             | N.D.              |
| His      | < 2                   | < 2               | < 2              | < 2               | < 2              | < 2               | N.D.             | N.D.              |
| Phe      | < 2                   | < 2               | < 2              | < 2               | < 2              | < 2               | N.D.             | N.D.              |
| Tyr      | < 2                   | < 2               | < 2              | < 2               | < 2              | < 2               | N.D.             | N.D.              |
| Trp      | < 2                   | < 2               | < 2              | < 2               | < 2              | < 2               | N.D.             | N.D.              |
| Met      | < 2                   | < 2               | < 2              | < 2               | < 2              | < 2               | N.D.             | N.D.              |
| Cys      | < 2                   | 8.1 ± 3.2         | < 2              | 10.8 ± 3.9        | < 2              | < 2               | N.D.             | 23.8 ± 1.0        |

\*1 The unit of all activity values is nmol min<sup>-1</sup> mg protein<sup>-1</sup>.

\*2 N.D., not determined.

# FIGURE S1A

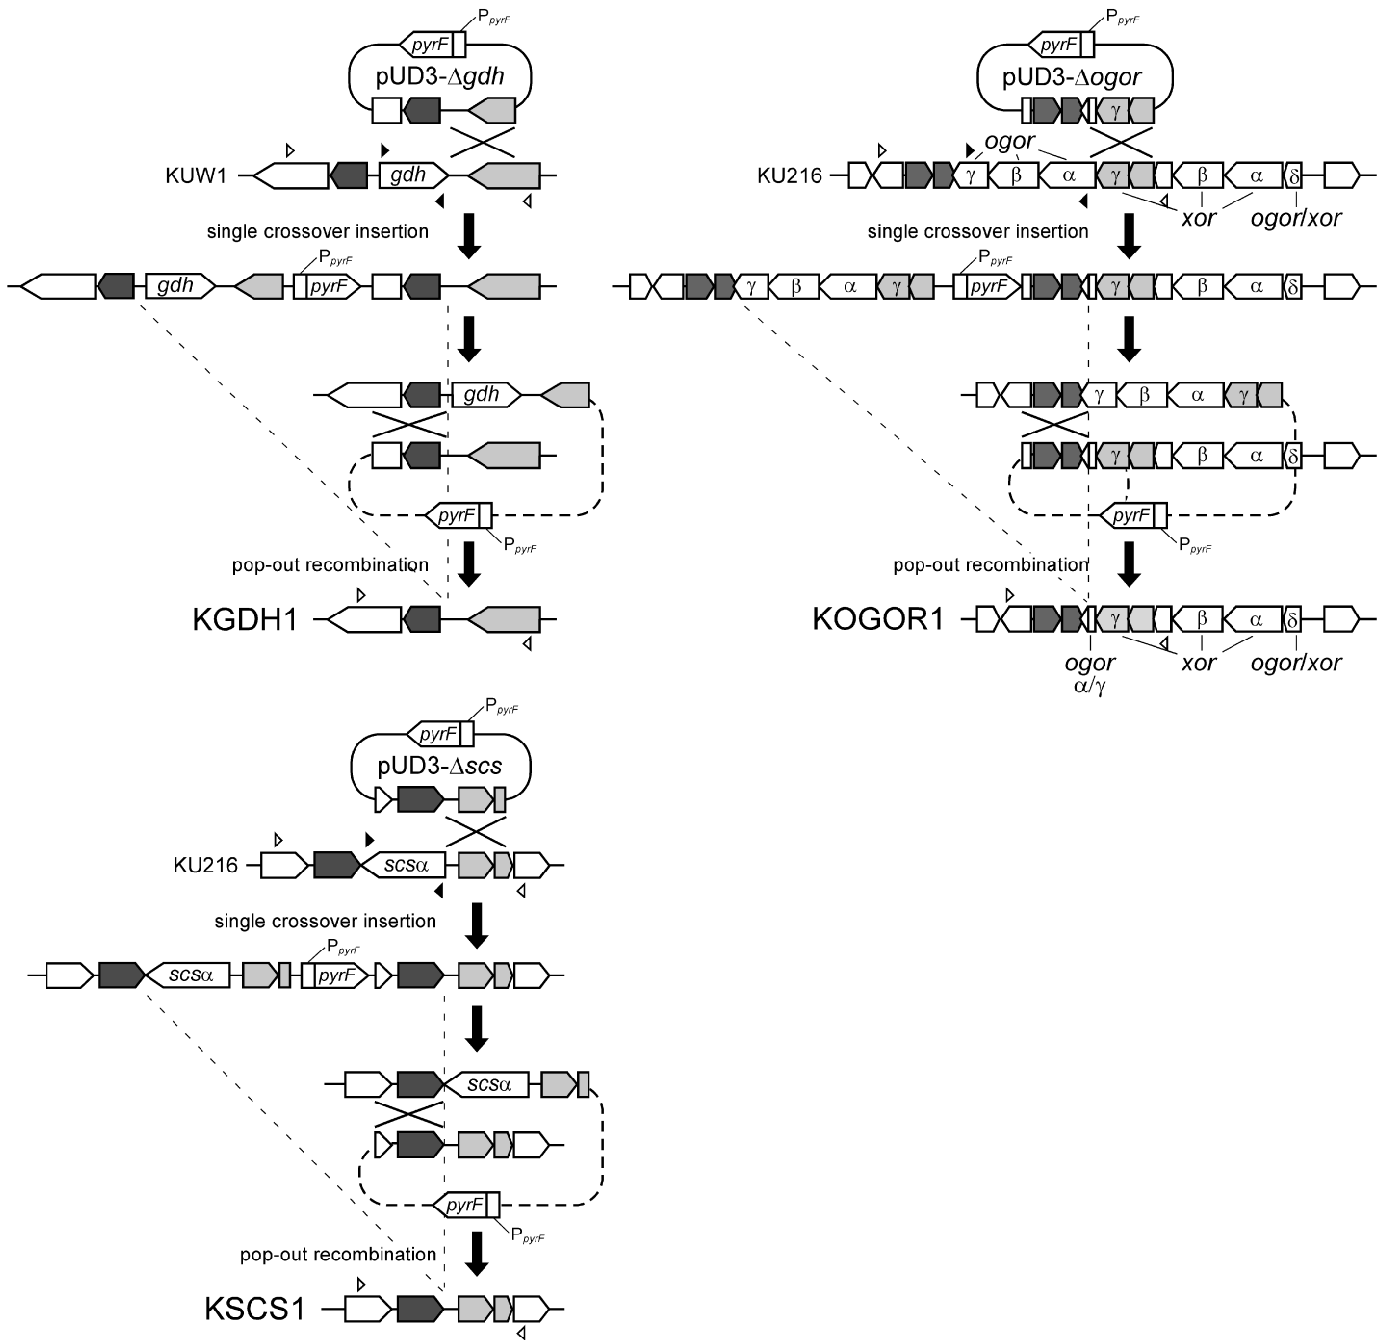

## FIGURE S1B

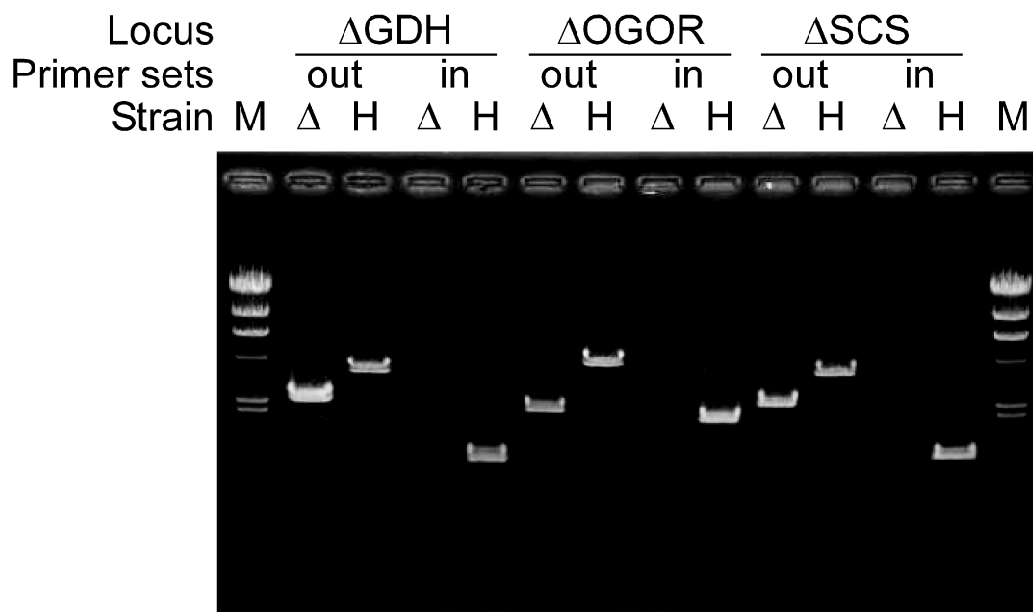

Fig. S1. Construction of gene disruption strains of GDH, OGOR and SCS in *T. kodakarensis*. (A) Design of the plasmids and recombination strategies for the disruption of the GDH, OGOR and SCS. In the case of GDH, the TK1431 gene was entirely deleted. In the case of OGOR and SCS, for details see Materials and Methods. Arrowheads indicate the position of the primers used for PCR analyses in (B). Open arrowheads represent primer sets that anneal outside of the homologous regions and closed arrowheads represent primer sets that anneal within the coding region of the gene disrupted. (B) PCR analyses of the three loci confirming gene disruption. The specific loci, primer sets and strains for template DNA are indicated above the gel. Out/in represent primer sets indicated by open/closed arrowheads in (A);  $\Delta$ , disruption strain; H, host strain; M, marker.
